# Supplementary material for: Destabilizers of the thymidylate synthase homodimer accelerate its proteasomal degradation and inhibit cancer growth
Source: eLife. 2022 Dec 7;11:e73862. doi: 10.7554/eLife.73862 (PMC9831607; doi:10.7554/eLife.73862)
Supplement: Figure 3—figure supplement 1—source data 1. [file elife-73862-fig3-figsupp1-data1.xlsx]

## Sheet: Sheet1
Data from the AEX experiments (AEX rconstitued chromathogram 280nm and 350nm)
fraction number	wavelenghts (Multiskan Go, Thermo Fisher)
(2mL/min) from FPLC (Akta Prime)	280nm	350nm		we have reported the value '0' when spctrophotometer data measured <0.001
1	0	0
2	0	0
3	0	0
4	0	0
5	0.001	0
6	0.005	0
7	0.009	0
8	0.008	0
9	0.008	0
10	0.007	0
11	0.003	0
12	0.006	0
13	0.006	0
14	0.009	0
15	0.007	0
16	0.011	0.001
17	0.014	0.0057
18	0.02	0.0101
19	0.0665	0.0117
20	0.237	0.0096
21	0.086	0
22	0.0284	0
23	0.0114	0
24	0.0109	0
25	0.011	0.0023
26	0.02	0.0101
27	0.0398	0.0088
28	0.0279	0.0048
29	0.003	0.002
30	0	0
31	0	0
32	0	0
33	0	0
34	0	0
35	0	0.004
36	0	0.005
37	0	0.0066
38	0	0.001
39	0	0
40	0	0
41	0	0
42	0	0
43	0	0
44	0	0
45	0	0
