# Supplementary material for: Destabilizers of the thymidylate synthase homodimer accelerate its proteasomal degradation and inhibit cancer growth
Source: eLife. 2022 Dec 7;11:e73862. doi: 10.7554/eLife.73862 (PMC9831607; doi:10.7554/eLife.73862)
Supplement: Figure 3—figure supplement 2—source data 1. [file elife-73862-fig3-figsupp2-data1.xlsx]

## Sheet: 4uM 1130 Orbitrap MS
Fractions from Akta FPLC	MS amount	280nm UV (Multiskan GO)
2	0	0.002
3	0	0.003		Calibration Curve
4	0	0.001		Cal n	Concentration, nM	Area (SIM)
5	0	0		1	1	868700
6	1.04	0		2	2	1706000
7	1.93	0.032		3	10	8170000
8	5.57	0.012		4	20	13710000
9	5.12	0.0085		5	100	60620000
10	3.179	0.0068		6	200	102100000
11	1.66	0.006		7	500	302900000
12	1.12	0.001
13	1.02	0.002
14	0	0.006
15	0	0.008
16	1.23	0.009
17	1.01	0.01
18	1.45	0.015
19	1.2	0.085
20	6.14	0.28
21	4.916	0.025
22	2.24	0.012
23	2.01	0.001
24	3.4	0.001
25	49.784	0.059
26	77.02	0.033
27	9.56	0.012
28	2.67	0.011
29	2.82	0.003
30	3.44	0.003
31	1.12	0.001
32	1.89	0.005
33	1.18	0.01
34	2.26	0.003
35	17.998	0.001
36	10.47	0.003
37	2.01	0.005
