# Supplementary material for: Destabilizers of the thymidylate synthase homodimer accelerate its proteasomal degradation and inhibit cancer growth
Source: eLife. 2022 Dec 7;11:e73862. doi: 10.7554/eLife.73862 (PMC9831607; doi:10.7554/eLife.73862)
Supplement: Figure 4—source data 1. [file elife-73862-fig4-data1.xlsx]

## Sheet: 5A
wl nm	If 0 C3	If 1 C3	If 2 C3	If 3 C3	If 4 C3	If 5 C3	If 6 C3			Spectroscopic and mechanistic analysis of hTS dissociative inhibition for compounds C2, C3 and C4
--	--	--	--	--	--	--	--
460	0.01617	0.06811	0.07895	0.05692	0.02995	0.08287	0.01617
461	0.01488	0.06078	0.07218	0.05121	0.02709	0.07363	0.01488
462	0.0136	0.05362	0.06298	0.04698	0.02325	0.06421	0.0136
463	0.01283	0.04992	0.05714	0.04381	0.02164	0.05729	0.01283
464	0.01159	0.04672	0.05161	0.04066	0.01969	0.05269	0.01159
465	0.0112	0.04349	0.04856	0.0372	0.01907	0.04805	0.0112
466	0.0109	0.04106	0.04691	0.03555	0.01869	0.04603	0.0109
467	0.00984	0.0398	0.04583	0.03522	0.01742	0.0439	0.00984
468	0.01029	0.0374	0.04265	0.03223	0.01649	0.04109	0.01029
469	0.00973	0.03587	0.03984	0.02988	0.01536	0.03844	0.00973
470	0.0088	0.03239	0.03722	0.02726	0.01585	0.03563	0.0088
471	0.00843	0.03158	0.03396	0.02659	0.01434	0.03372	0.00843
472	0.00887	0.03062	0.03398	0.02599	0.01419	0.03163	0.00887
473	0.00879	0.02923	0.03176	0.02525	0.01325	0.0298	0.00879
474	0.00871	0.02696	0.03061	0.02454	0.01368	0.02901	0.00871
475	0.009	0.02699	0.03009	0.02303	0.01365	0.02819	0.009
476	0.00916	0.02588	0.02942	0.02201	0.01374	0.0259	0.00916
477	0.00986	0.0265	0.02864	0.02227	0.01351	0.02591	0.00986
478	0.00995	0.02642	0.02896	0.02203	0.01471	0.02631	0.00995
479	0.01102	0.02711	0.02884	0.02432	0.01516	0.02613	0.01102
480	0.01236	0.0271	0.03051	0.02489	0.01645	0.02769	0.01236
481	0.0145	0.02824	0.03061	0.02592	0.0186	0.02882	0.0145
482	0.016	0.02927	0.03306	0.02738	0.02056	0.03014	0.016
483	0.01705	0.03192	0.03322	0.02948	0.02263	0.03236	0.01705
484	0.01983	0.03453	0.03772	0.03284	0.02587	0.03435	0.01983
485	0.02303	0.03705	0.04119	0.03687	0.02987	0.03846	0.02303
486	0.02743	0.04282	0.04365	0.03939	0.03449	0.04207	0.02743
487	0.03217	0.04587	0.04949	0.04497	0.03983	0.04752	0.03217
488	0.03748	0.05306	0.05647	0.05211	0.04795	0.05422	0.03748
489	0.04401	0.06096	0.06188	0.05966	0.05577	0.05962	0.04401
490	0.05077	0.06976	0.07156	0.06962	0.06745	0.07141	0.05077
491	0.06041	0.08003	0.08439	0.08069	0.07821	0.08241	0.06041
492	0.07163	0.08977	0.09661	0.09594	0.09317	0.09584	0.07163
493	0.08736	0.10733	0.11318	0.11116	0.10975	0.11366	0.08736
494	0.10032	0.12323	0.13322	0.13153	0.12952	0.1301	0.10032
495	0.11939	0.14086	0.14996	0.15174	0.15184	0.15323	0.11939
496	0.14248	0.16302	0.17384	0.17471	0.17524	0.17661	0.14248
497	0.16339	0.18861	0.20099	0.20344	0.20197	0.20003	0.16339
498	0.18894	0.21573	0.22566	0.23009	0.23671	0.22961	0.18894
499	0.21786	0.24581	0.25794	0.26236	0.26751	0.26279	0.21786
500	0.25317	0.28079	0.29047	0.30079	0.31068	0.30246	0.25317
501	0.2909	0.31716	0.33393	0.33955	0.3504	0.34477	0.2909
502	0.32811	0.35509	0.37436	0.38552	0.39238	0.38459	0.32811
503	0.36746	0.40126	0.42177	0.42978	0.43704	0.43279	0.36746
504	0.41384	0.43623	0.4556	0.47379	0.48883	0.47766	0.41384
505	0.45786	0.48682	0.5093	0.51852	0.5348	0.52515	0.45786
506	0.50595	0.53746	0.55667	0.5709	0.5844	0.57425	0.50595
507	0.5522	0.58739	0.60491	0.61569	0.63004	0.6186	0.5522
508	0.60822	0.63445	0.6525	0.66789	0.67818	0.66513	0.60822
509	0.65572	0.68104	0.6966	0.71692	0.72532	0.71589	0.65572
510	0.70029	0.72127	0.7399	0.76106	0.76751	0.7598	0.70029
511	0.74824	0.76695	0.78354	0.7974	0.81385	0.79903	0.74824
512	0.79416	0.81316	0.8236	0.83463	0.85013	0.83844	0.79416
513	0.82169	0.84804	0.85848	0.87024	0.88533	0.86889	0.82169
514	0.86384	0.88627	0.89359	0.90291	0.91859	0.907	0.86384
515	0.90036	0.90953	0.91367	0.92629	0.93349	0.93125	0.90036
516	0.922	0.93042	0.94149	0.95104	0.96073	0.94174	0.922
517	0.94399	0.95868	0.95909	0.97632	0.9785	0.96388	0.94399
518	0.9614	0.97067	0.97152	0.9815	0.99336	0.97675	0.9614
519	0.97282	0.99145	0.97752	0.99719	0.99503	0.98762	0.97282
520	0.98598	0.99563	0.99373	0.99427	1.00004	0.99655	0.98598
521	0.9954	0.99432	0.99996	0.99979	1.0047	0.99998	0.9954
522	0.99999	1.0001	0.99987	1.0001	0.99724	0.98632	0.99999
523	0.99939	0.99727	0.99285	0.99802	0.99585	0.98314	0.99939
524	0.99323	0.99461	0.98642	0.98662	0.98437	0.97934	0.99323
525	0.99166	0.99133	0.97799	0.98017	0.97492	0.96375	0.99166
526	0.9791	0.9796	0.97192	0.96781	0.95939	0.95497	0.9791
527	0.9666	0.95998	0.96115	0.95592	0.94628	0.94194	0.9666
528	0.94643	0.95392	0.94299	0.93574	0.92738	0.92338	0.94643
529	0.93408	0.93512	0.92655	0.91644	0.91246	0.90412	0.93408
530	0.92147	0.92484	0.90214	0.90006	0.88836	0.88237	0.92147
531	0.8947	0.89888	0.88933	0.87546	0.87149	0.86234	0.8947
532	0.87323	0.87928	0.85941	0.85238	0.84522	0.83558	0.87323
533	0.84641	0.85908	0.84821	0.8317	0.82471	0.81719	0.84641
534	0.82945	0.83576	0.81513	0.80577	0.79689	0.79649	0.82945
535	0.80679	0.80684	0.79197	0.78439	0.76701	0.77012	0.80679
536	0.77574	0.77988	0.76426	0.75223	0.7452	0.74342	0.77574
537	0.75646	0.75674	0.74216	0.73161	0.71779	0.72397	0.75646
538	0.72432	0.7323	0.71727	0.70654	0.70008	0.69086	0.72432
539	0.70168	0.70147	0.69242	0.67485	0.66804	0.66054	0.70168
540	0.67032	0.67747	0.66225	0.64959	0.64126	0.64197	0.67032
541	0.65726	0.66036	0.63713	0.63108	0.61798	0.61834	0.65726
542	0.63088	0.63931	0.61804	0.60368	0.59876	0.60088	0.63088
543	0.61917	0.61862	0.59542	0.59062	0.57775	0.58244	0.61917
544	0.5934	0.59939	0.58196	0.57083	0.55996	0.55684	0.5934
545	0.57965	0.5812	0.56434	0.55368	0.5483	0.54361	0.57965
546	0.57053	0.56634	0.55195	0.5427	0.53666	0.53131	0.57053
547	0.55405	0.55853	0.54176	0.52432	0.51901	0.51534	0.55405
548	0.54747	0.54797	0.5236	0.51534	0.50883	0.50221	0.54747
549	0.53983	0.53625	0.52029	0.50463	0.49032	0.48828	0.53983
550	0.52919	0.5323	0.50746	0.48982	0.48634	0.47759	0.52919
551	0.52731	0.52123	0.49807	0.48862	0.47537	0.47329	0.52731
552	0.52388	0.51778	0.49621	0.48131	0.46383	0.46554	0.52388
553	0.52426	0.52051	0.49177	0.47556	0.45721	0.45777	0.52426
554	0.52796	0.51424	0.48516	0.46942	0.45831	0.45295	0.52796
555	0.53274	0.51452	0.4875	0.45998	0.4523	0.44814	0.53274
556	0.54612	0.51796	0.48545	0.46669	0.44838	0.45028	0.54612
557	0.5564	0.52091	0.48283	0.46271	0.45174	0.44715	0.5564
558	0.56794	0.52988	0.48959	0.45808	0.44927	0.44012	0.56794
559	0.58094	0.53507	0.4928	0.46045	0.45517	0.44364	0.58094
560	0.59535	0.53573	0.49826	0.46467	0.45281	0.44653	0.59535
561	0.61312	0.55212	0.50692	0.46848	0.45385	0.45434	0.61312
562	0.63453	0.56002	0.50939	0.47443	0.46102	0.45511	0.63453
563	0.65069	0.57635	0.52305	0.47313	0.45617	0.46033	0.65069
564	0.67174	0.58308	0.52997	0.48173	0.47064	0.4631	0.67174
565	0.68709	0.58839	0.53635	0.48372	0.4699	0.46162	0.68709
566	0.70629	0.60635	0.54411	0.49303	0.47827	0.46947	0.70629
567	0.73017	0.61239	0.54887	0.49517	0.47777	0.47475	0.73017
568	0.74313	0.62838	0.55216	0.49656	0.48693	0.47785	0.74313
569	0.76654	0.6286	0.56014	0.50137	0.48688	0.47962	0.76654
570	0.77632	0.64435	0.56166	0.50325	0.48729	0.48282	0.77632
571	0.79445	0.64887	0.57043	0.50463	0.49661	0.48126	0.79445
572	0.80014	0.64826	0.57777	0.50702	0.49951	0.48597	0.80014
573	0.80483	0.65827	0.57448	0.50555	0.49217	0.48414	0.80483
574	0.81497	0.65934	0.57075	0.50453	0.49034	0.48575	0.81497
575	0.82409	0.66053	0.57437	0.50223	0.48955	0.48004	0.82409
576	0.82105	0.66503	0.57118	0.49632	0.48644	0.4807	0.82105
577	0.82984	0.65331	0.56855	0.49739	0.48349	0.47523	0.82984
578	0.82195	0.652	0.56769	0.48801	0.48013	0.47014	0.82195
579	0.81574	0.64625	0.55303	0.48116	0.47049	0.46382	0.81574
580	0.80494	0.6375	0.55067	0.47497	0.46661	0.46033	0.80494
581	0.79024	0.63387	0.53952	0.46437	0.45056	0.45294	0.79024
582	0.78647	0.61415	0.52484	0.45678	0.4432	0.44425	0.78647
583	0.77299	0.60797	0.52134	0.44611	0.43982	0.4303	0.77299
584	0.76059	0.59622	0.51508	0.43782	0.42894	0.42117	0.76059
585	0.74392	0.5739	0.49269	0.43137	0.41572	0.4123	0.74392
586	0.72513	0.56687	0.48421	0.41989	0.40724	0.40342	0.72513
587	0.70129	0.55385	0.47277	0.4048	0.39652	0.39505	0.70129
588	0.68164	0.53665	0.45554	0.39542	0.38076	0.3812	0.68164
589	0.67136	0.52184	0.44212	0.37822	0.37392	0.36862	0.67136
590	0.65544	0.49967	0.43297	0.36645	0.36108	0.35206	0.65544
591	0.62557	0.48306	0.41786	0.35697	0.34985	0.3456	0.62557
592	0.60122	0.46875	0.40197	0.34161	0.33789	0.33235	0.60122
593	0.58687	0.45166	0.39117	0.33169	0.32496	0.31951	0.58687
594	0.55774	0.43496	0.373	0.31973	0.31245	0.30462	0.55774
595	0.53968	0.41988	0.35669	0.3052	0.29715	0.29414	0.53968
596	0.51485	0.40073	0.34272	0.29003	0.28767	0.28265	0.51485
597	0.49776	0.3842	0.33047	0.28231	0.27446	0.2733	0.49776
598	0.47835	0.36856	0.31635	0.26855	0.26351	0.26227	0.47835
599	0.4624	0.35267	0.30517	0.26278	0.25475	0.25102	0.4624
600	0.43812	0.33927	0.29055	0.25123	0.24577	0.24434	0.43812
601	0.4195	0.32546	0.27623	0.23811	0.23335	0.23022	0.4195
602	0.40452	0.31094	0.26397	0.22904	0.22504	0.2219	0.40452
603	0.38754	0.29846	0.25485	0.21686	0.21006	0.21406	0.38754
604	0.37265	0.28247	0.24565	0.20739	0.20481	0.20261	0.37265
605	0.35238	0.27029	0.23569	0.20108	0.19768	0.19532	0.35238
606	0.34056	0.26032	0.22409	0.1929	0.18651	0.18874	0.34056
607	0.32711	0.25138	0.21508	0.18193	0.17814	0.1795	0.32711
608	0.30993	0.2362	0.20431	0.1739	0.17184	0.17172	0.30993
609	0.29462	0.23192	0.19693	0.16841	0.16733	0.16419	0.29462
610	0.28781	0.22092	0.18913	0.16334	0.15957	0.16111	0.28781
611	0.27258	0.2108	0.18361	0.15689	0.15067	0.15196	0.27258
612	0.26294	0.20616	0.1752	0.1477	0.14765	0.14498	0.26294
613	0.25198	0.19451	0.16554	0.14304	0.14273	0.14067	0.25198
614	0.24207	0.19223	0.16239	0.13779	0.1353	0.13383	0.24207
615	0.23548	0.17887	0.15777	0.13385	0.12964	0.13031	0.23548
616	0.22571	0.17267	0.15144	0.12909	0.12714	0.12514	0.22571
617	0.2183	0.16923	0.14765	0.12676	0.12026	0.12078	0.2183
618	0.21018	0.16237	0.13915	0.11843	0.1182	0.11399	0.21018
619	0.20546	0.16063	0.13876	0.11708	0.11334	0.11261	0.20546
620	0.19398	0.15143	0.13061	0.11411	0.10992	0.11021	0.19398
621	0.19173	0.14815	0.12656	0.1101	0.1043	0.10567	0.19173
622	0.18326	0.14629	0.12294	0.10838	0.10385	0.10287	0.18326
623	0.18039	0.13933	0.11648	0.1037	0.10002	0.09981	0.18039
624	0.17474	0.13464	0.11609	0.09959	0.09554	0.0976	0.17474
625	0.17126	0.13024	0.10995	0.09517	0.09273	0.09254	0.17126
626	0.1635	0.12664	0.10997	0.09256	0.0904	0.09144	0.1635
627	0.1584	0.12465	0.10708	0.0916	0.08879	0.08752	0.1584
628	0.15376	0.11838	0.10131	0.0862	0.08564	0.08568	0.15376
629	0.14816	0.11338	0.09912	0.08723	0.08147	0.08254	0.14816
630	0.14646	0.11387	0.09663	0.08096	0.07898	0.07912	0.14646
631	0.13988	0.10746	0.0951	0.07802	0.07489	0.07773	0.13988
632	0.1358	0.10715	0.09287	0.07709	0.07388	0.07523	0.1358
633	0.13126	0.10222	0.08763	0.07397	0.07331	0.07263	0.13126
634	0.13029	0.09713	0.08549	0.07287	0.06861	0.07018	0.13029
635	0.12333	0.09536	0.08116	0.07038	0.06839	0.06799	0.12333
636	0.1207	0.09163	0.07953	0.06758	0.06479	0.06668	0.1207
637	0.11556	0.08979	0.07624	0.06441	0.06425	0.06388	0.11556
638	0.11292	0.08974	0.07312	0.06334	0.06018	0.06212	0.11292
639	0.11106	0.08687	0.07239	0.061	0.05849	0.06083	0.11106
640	0.10752	0.08272	0.07047	0.059	0.05786	0.05808	0.10752
641	0.10705	0.08165	0.06874	0.05775	0.05847	0.05957	0.10705
642	0.10131	0.08044	0.06834	0.05536	0.05509	0.05568	0.10131
643	0.09826	0.07602	0.06359	0.05367	0.0533	0.05403	0.09826
644	0.09929	0.0757	0.06465	0.05424	0.05262	0.05269	0.09929
645	0.09359	0.07211	0.06111	0.05306	0.05059	0.05105	0.09359
646	0.09276	0.07107	0.05922	0.05129	0.0487	0.04946	0.09276
647	0.08856	0.06932	0.05904	0.04879	0.04768	0.049	0.08856
648	0.08565	0.06639	0.05591	0.04803	0.04528	0.04766	0.08565
649	0.08314	0.06443	0.05409	0.04622	0.04518	0.04513	0.08314
650	0.08063	0.06224	0.05306	0.04446	0.04324	0.04469	0.08063
651	0.0766	0.06173	0.05243	0.04335	0.04118	0.04313	0.0766
652	0.07419	0.05825	0.04964	0.04106	0.04056	0.04102	0.07419
653	0.07196	0.05748	0.04893	0.04036	0.03989	0.03987	0.07196
654	0.06862	0.05504	0.04539	0.03933	0.0367	0.03815	0.06862
655	0.06683	0.05074	0.04317	0.03592	0.03554	0.03825	0.06683
656	0.06345	0.05068	0.04169	0.03622	0.03493	0.03734	0.06345
657	0.06073	0.04891	0.04217	0.03458	0.03413	0.03539	0.06073
658	0.05831	0.04614	0.03918	0.03473	0.03285	0.0335	0.05831
659	0.05642	0.04493	0.0394	0.0323	0.03136	0.03199	0.05642
660	0.05377	0.04336	0.03717	0.03046	0.02786	0.03103	0.05377
661	0.05195	0.04145	0.03506	0.03023	0.0291	0.03049	0.05195
662	0.04802	0.04027	0.03459	0.0289	0.0268	0.02906	0.04802
663	0.04645	0.03849	0.0321	0.02713	0.02596	0.02657	0.04645
664	0.04525	0.0354	0.03187	0.02633	0.02579	0.02567	0.04525
665	0.04278	0.03396	0.03034	0.02501	0.02425	0.02408	0.04278
666	0.04074	0.03479	0.02984	0.02438	0.0228	0.02433	0.04074
667	0.04033	0.034	0.02899	0.02349	0.02156	0.02399	0.04033
668	0.03733	0.03161	0.0263	0.02257	0.0221	0.02221	0.03733
669	0.03516	0.03057	0.02624	0.02216	0.01994	0.02195	0.03516
670	0.03373	0.02856	0.02612	0.02046	0.01852	0.02067	0.03373
671	0.03312	0.02874	0.02445	0.0205	0.01953	0.02036	0.03312
672	0.03111	0.02744	0.0232	0.01967	0.01744	0.0194	0.03111
673	0.03025	0.02604	0.02247	0.01839	0.01642	0.01894	0.03025
674	0.02895	0.02532	0.02296	0.01802	0.01673	0.0178	0.02895
675	0.02712	0.0246	0.02204	0.01723	0.0157	0.01719	0.02712
676	0.02702	0.02432	0.02027	0.01702	0.01551	0.01727	0.02702
677	0.02545	0.023	0.02024	0.01654	0.01436	0.01615	0.02545
678	0.02448	0.02205	0.01918	0.01515	0.01447	0.0154	0.02448
679	0.02338	0.02075	0.01917	0.01558	0.01389	0.01526	0.02338
680	0.02273	0.02091	0.01851	0.01441	0.01327	0.01472	0.02273

## Sheet: 5B
[C3] uM	fret eff	[C2] uM	fret eff	[C4] uM	fret eff	fitting C3		fitting C2		fitting C4
0	0.98	0	0.95	0	0.98	0	0.95	0	0.98	0	0.98
1	0.83	1	0.88873	5	0.82	2.5	0.79693	2.5	0.92973	2.5	0.89142
4.5	0.71669	4.9	0.83	47	0.51018	5	0.70915	5	0.88646	5	0.83033
5	0.73	42	0.57504	92	0.47978	7.5	0.64983	7.5	0.84835	7.5	0.78028
9	0.67	10	0.81382	135	0.43958	10	0.6083	10	0.8148	10	0.73912
9.5	0.56879	24	0.71026	19	0.71389	12.5	0.57815	12.5	0.78525	12.5	0.70505
18	0.55	53	0.59234	1.7	0.84033	15	0.55554	15	0.75919	15	0.67664
22	0.53	98	0.53724	30	0.59331	17.5	0.53808	17.5	0.73615	17.5	0.65273
27	0.49041	149	0.48131			20	0.52426	20	0.71572	20	0.63244
36	0.49					22.5	0.5131	22.5	0.69754	22.5	0.61508
52	0.49445					25	0.50391	25	0.68132	25	0.6001
55	0.44					27.5	0.49624	27.5	0.66678	27.5	0.58708
70	0.45					30	0.48975	30	0.65372	30	0.57569
95	0.45768					32.5	0.48418	32.5	0.64193	32.5	0.56564
108	0.415					35	0.47937	35	0.63126	35	0.55674
						37.5	0.47516	37.5	0.62157	37.5	0.54881
						40	0.47146	40	0.61274	40	0.54169
						42.5	0.46818	42.5	0.60466	42.5	0.53529
						45	0.46525	45	0.59727	45	0.52949
						47.5	0.46262	47.5	0.59046	47.5	0.52422
						50	0.46025	50	0.58419	50	0.51942
						52.5	0.4581	52.5	0.5784	52.5	0.51503
						55	0.45614	55	0.57304	55	0.51099
						57.5	0.45435	57.5	0.56805	57.5	0.50727
						60	0.4527	60	0.56342	60	0.50384
						62.5	0.45119	62.5	0.55909	62.5	0.50066
						65	0.44979	65	0.55505	65	0.4977
						67.5	0.4485	67.5	0.55127	67.5	0.49495
						70	0.44729	70	0.54772	70	0.49238
						72.5	0.44617	72.5	0.54439	72.5	0.48997
						75	0.44513	75	0.54125	75	0.48772
						77.5	0.44415	77.5	0.53829	77.5	0.48561
						80	0.44323	80	0.5355	80	0.48362
						82.5	0.44236	82.5	0.53286	82.5	0.48175
						85	0.44155	85	0.53037	85	0.47998
						87.5	0.44079	87.5	0.528	87.5	0.47831
						90	0.44006	90	0.52575	90	0.47672
						92.5	0.43938	92.5	0.52362	92.5	0.47522
						95	0.43873	95	0.52159	95	0.4738
						97.5	0.43812	97.5	0.51965	97.5	0.47245
						100	0.43753	100	0.51781	100	0.47116
						102.5	0.43698	102.5	0.51605	102.5	0.46993
						105	0.43645	105	0.51437	105	0.46876
						107.5	0.43594	107.5	0.51276	107.5	0.46765
						110	0.43546	110	0.51122	110	0.46658
						112.5	0.435	112.5	0.50975	112.5	0.46556
						115	0.43456	115	0.50833	115	0.46458
						117.5	0.43414	117.5	0.50698	117.5	0.46364
						120	0.43374	120	0.50568	120	0.46275
						122.5	0.43335	122.5	0.50442	122.5	0.46188
						125	0.43298	125	0.50322	125	0.46105
						127.5	0.43262	127.5	0.50206	127.5	0.46026
						130	0.43228	130	0.50095	130	0.45949
						132.5	0.43195	132.5	0.49987	132.5	0.45875
						135	0.43163	135	0.49884	135	0.45804
						137.5	0.43133	137.5	0.49784	137.5	0.45736
						140	0.43103	140	0.49687	140	0.4567
						142.5	0.43075	142.5	0.49594	142.5	0.45606
						145	0.43047	145	0.49504	145	0.45544
						147.5	0.43021	147.5	0.49417	147.5	0.45484
						150	0.42995	150	0.49332	150	0.45427

## Sheet: 5D
[Enz] 490 nM		[Enz] 250 nM		[Enz] 100 nM		[Enz] 50 nM
[C3] uM	fret ef	[C3] uM	fret ef	[C3] uM	fret ef	[C3] uM	fret ef
0	0.98	0	0.95	0	0.97	5	0.50639
73	0.65	5	0.85	1	0.83	5	0.40168
97	0.63	10	0.68	5	0.73	5	0.29
		19	0.6	9	0.67	5	0.27926
		25	0.57	18	0.55
		50	0.55	22	0.53
		56	0.54	36	0.49
		71	0.6	55	0.44
		85	0.595	70	0.45
				52	0.49445
				95	0.45768
				27	0.49041
				9.5	0.56879
				4.5	0.71669

## Sheet: 5E
[C3] 0		[C3] sat
x	fret ef	x	fret ef
3100.56	0.72101	2408.32	0.29
4855	0.556	2000	0.44
2390	0.855	1452.97	0.57
3728.04	0.69491	1188.72	0.65
1661.21	0.91068
2786.87	0.77667

## Sheet: 5F 
experimental results
[Inhib] µM	[mTHF] mM	ΔOD/min	V mM s-1
0	3	0.0184	0.0479167
0	6	0.0327	0.0851563
0	12	0.0512	0.133333
0	24	0.0656	0.170833
0	48	0.0752	0.195833
0	65	0.0818	0.213021
12	3	0.0138	0.0359375
12	6	0.0221	0.0575521
12	12	0.0318	0.0828125
12	24	0.0447	0.116406
12	48	0.0559	0.145573
12	65	0.0626	0.163021
24	3	0.0096	0.025
24	6	0.0173	0.0450521
24	12	0.0261	0.0679687
24	24	0.0301	0.0783854
24	48	0.0374	0.0973958
24	65	0.0489	0.127344
36	3	0.0075	0.0195312
36	6	0.0126	0.0328125
36	12	0.0193	0.0502604
36	24	0.0258	0.0671875
36	48	0.0296	0.0770833
36	65	0.0333	0.0867187
