# Supplementary material for: Destabilizers of the thymidylate synthase homodimer accelerate its proteasomal degradation and inhibit cancer growth
Source: eLife. 2022 Dec 7;11:e73862. doi: 10.7554/eLife.73862 (PMC9831607; doi:10.7554/eLife.73862)
Supplement: Figure 4—source data 2. [file elife-73862-fig4-data2.xlsx]

## Sheet: Sheet1
	Inhibition of hTS by compound C3
	fitting curves
	[Inhib] µM	[mTHF] mM	ΔOD/min	V mM s-1		D	2a	b	c	x=RADQ M2	v M s-1	v uM s-1
		0										0
	0	3				90000	0.000122474	1	100000	0.000435583	5.12278e-08	0.0512278
	0	6				90000	0.000122474	1	100000	0.000396428	8.48636e-08	0.0848636
	0	9				90000	0.000122474	1	100000	0.000366435	1.08762e-07	0.108762
	0	12				90000	0.000122474	1	100000	0.000342487	1.26681e-07	0.126681
	0	15				90000	0.000122474	1	100000	0.00032278	1.40653e-07	0.140653
	0	18				90000	0.000122474	1	100000	0.000306186	1.51875e-07	0.151875
	0	21				90000	0.000122474	1	100000	0.000291958	1.61103e-07	0.161103
	0	24				90000	0.000122474	1	100000	0.000279579	1.68835e-07	0.168835
	0	27				90000	0.000122474	1	100000	0.000268677	1.75416e-07	0.175416
	0	30				90000	0.000122474	1	100000	0.00025898	1.8109e-07	0.18109
	0	33				90000	0.000122474	1	100000	0.000250278	1.86038e-07	0.186038
	0	36				90000	0.000122474	1	100000	0.000242411	1.90393e-07	0.190393
	0	39				90000	0.000122474	1	100000	0.000235254	1.94259e-07	0.194259
	0	42				90000	0.000122474	1	100000	0.000228704	1.97715e-07	0.197715
	0	45				90000	0.000122474	1	100000	0.000222681	2.00826e-07	0.200826
	0	48				90000	0.000122474	1	100000	0.000217116	2.03642e-07	0.203642
	0	51				90000	0.000122474	1	100000	0.000211955	2.06205e-07	0.206205
	0	54				90000	0.000122474	1	100000	0.000207149	2.08547e-07	0.208547
	0	57				90000	0.000122474	1	100000	0.000202661	2.10697e-07	0.210697
	0	60				90000	0.000122474	1	100000	0.000198456	2.12678e-07	0.212678
	0	63				90000	0.000122474	1	100000	0.000194506	2.14511e-07	0.214511
	0	66				90000	0.000122474	1	100000	0.000190786	2.16211e-07	0.216211
	0	69				90000	0.000122474	1	100000	0.000187274	2.17793e-07	0.217793
		0										0
	12	3				209700	0.000269444	3.64	322000	0.000227632	3.25976e-08	0.0325976
	12	6				209700	0.000269444	3.64	322000	0.000209114	5.50193e-08	0.0550193
	12	9				209700	0.000269444	3.64	322000	0.000194592	7.14646e-08	0.0714646
	12	12				209700	0.000269444	3.64	322000	0.000182798	8.40855e-08	0.0840855
	12	15				209700	0.000269444	3.64	322000	0.000172965	9.41034e-08	0.0941034
	12	18				209700	0.000269444	3.64	322000	0.0001646	1.02265e-07	0.102265
	12	21				209700	0.000269444	3.64	322000	0.000157367	1.09055e-07	0.109055
	12	24				209700	0.000269444	3.64	322000	0.00015103	1.14799e-07	0.114799
	12	27				209700	0.000269444	3.64	322000	0.000145418	1.19728e-07	0.119728
	12	30				209700	0.000269444	3.64	322000	0.0001404	1.24008e-07	0.124008
	12	33				209700	0.000269444	3.64	322000	0.000135877	1.27764e-07	0.127764
	12	36				209700	0.000269444	3.64	322000	0.000131774	1.31087e-07	0.131087
	12	39				209700	0.000269444	3.64	322000	0.000128028	1.34052e-07	0.134052
	12	42				209700	0.000269444	3.64	322000	0.00012459	1.36714e-07	0.136714
	12	45				209700	0.000269444	3.64	322000	0.000121419	1.39119e-07	0.139119
	12	48				209700	0.000269444	3.64	322000	0.000118483	1.41304e-07	0.141304
	12	51				209700	0.000269444	3.64	322000	0.000115754	1.43298e-07	0.143298
	12	54				209700	0.000269444	3.64	322000	0.000113208	1.45127e-07	0.145127
	12	57				209700	0.000269444	3.64	322000	0.000110826	1.4681e-07	0.14681
	12	60				209700	0.000269444	3.64	322000	0.00010859	1.48365e-07	0.148365
	12	63				209700	0.000269444	3.64	322000	0.000106487	1.49807e-07	0.149807
	12	66				209700	0.000269444	3.64	322000	0.000104503	1.51147e-07	0.151147
	12	69				209700	0.000269444	3.64	322000	0.000102628	1.52397e-07	0.152397
		0										0
	24	3				343800	0.000416413	9.16	688000	0.000144938	2.16667e-08	0.0216667
	24	6				343800	0.000416413	9.16	688000	0.000134587	3.73648e-08	0.0373648
	24	9				343800	0.000416413	9.16	688000	0.000126228	4.93018e-08	0.0493018
	24	12				343800	0.000416413	9.16	688000	0.000119291	5.87089e-08	0.0587089
	24	15				343800	0.000416413	9.16	688000	0.00011341	6.63286e-08	0.0663286
	24	18				343800	0.000416413	9.16	688000	0.00010834	7.26366e-08	0.0726366
	24	21				343800	0.000416413	9.16	688000	0.000103908	7.7952e-08	0.077952
	24	24				343800	0.000416413	9.16	688000	9.9991e-05	8.24972e-08	0.0824972
	24	27				343800	0.000416413	9.16	688000	9.64946e-05	8.64321e-08	0.0864321
	24	30				343800	0.000416413	9.16	688000	9.33482e-05	8.9875e-08	0.089875
	24	33				343800	0.000416413	9.16	688000	9.04968e-05	9.2915e-08	0.092915
	24	36				343800	0.000416413	9.16	688000	8.78965e-05	9.56207e-08	0.0956207
	24	39				343800	0.000416413	9.16	688000	8.55124e-05	9.80458e-08	0.0980458
	24	42				343800	0.000416413	9.16	688000	8.33159e-05	1.00233e-07	0.100233
	24	45				343800	0.000416413	9.16	688000	8.12833e-05	1.02217e-07	0.102217
	24	48				343800	0.000416413	9.16	688000	7.93952e-05	1.04025e-07	0.104025
	24	51				343800	0.000416413	9.16	688000	7.76351e-05	1.0568e-07	0.10568
	24	54				343800	0.000416413	9.16	688000	7.59891e-05	1.07202e-07	0.107202
	24	57				343800	0.000416413	9.16	688000	7.44452e-05	1.08606e-07	0.108606
	24	60				343800	0.000416413	9.16	688000	7.29933e-05	1.09906e-07	0.109906
	24	63				343800	0.000416413	9.16	688000	7.16245e-05	1.11114e-07	0.111114
	24	66				343800	0.000416413	9.16	688000	7.03311e-05	1.12239e-07	0.112239
	24	69				343800	0.000416413	9.16	688000	6.91065e-05	1.1329e-07	0.11329
		0										0
	36	3				492300	0.000563383	17.56	1.198e+06	0.000105771	1.65228e-08	0.0165228
	36	6				492300	0.000563383	17.56	1.198e+06	9.87184e-05	2.87858e-08	0.0287858
	36	9				492300	0.000563383	17.56	1.198e+06	9.29444e-05	3.82753e-08	0.0382753
	36	12				492300	0.000563383	17.56	1.198e+06	8.81011e-05	4.58536e-08	0.0458536
	36	15				492300	0.000563383	17.56	1.198e+06	8.39606e-05	5.20562e-08	0.0520562
	36	18				492300	0.000563383	17.56	1.198e+06	8.03667e-05	5.72341e-08	0.0572341
	36	21				492300	0.000563383	17.56	1.198e+06	7.72079e-05	6.16273e-08	0.0616273
	36	24				492300	0.000563383	17.56	1.198e+06	7.44023e-05	6.54055e-08	0.0654055
	36	27				492300	0.000563383	17.56	1.198e+06	7.18881e-05	6.86923e-08	0.0686923
	36	30				492300	0.000563383	17.56	1.198e+06	6.96178e-05	7.15801e-08	0.0715801
	36	33				492300	0.000563383	17.56	1.198e+06	6.75541e-05	7.4139e-08	0.074139
	36	36				492300	0.000563383	17.56	1.198e+06	6.56671e-05	7.64237e-08	0.0764237
	36	39				492300	0.000563383	17.56	1.198e+06	6.39329e-05	7.84771e-08	0.0784771
	36	42				492300	0.000563383	17.56	1.198e+06	6.23317e-05	8.03335e-08	0.0803335
	36	45				492300	0.000563383	17.56	1.198e+06	6.08472e-05	8.20208e-08	0.0820208
	36	48				492300	0.000563383	17.56	1.198e+06	5.94659e-05	8.35617e-08	0.0835617
	36	51				492300	0.000563383	17.56	1.198e+06	5.81762e-05	8.49749e-08	0.0849749
	36	54				492300	0.000563383	17.56	1.198e+06	5.69684e-05	8.62762e-08	0.0862762
	36	57				492300	0.000563383	17.56	1.198e+06	5.5834e-05	8.74788e-08	0.0874788
	36	60				492300	0.000563383	17.56	1.198e+06	5.4766e-05	8.85937e-08	0.0885937
	36	63				492300	0.000563383	17.56	1.198e+06	5.3758e-05	8.96306e-08	0.0896306
	36	66				492300	0.000563383	17.56	1.198e+06	5.28045e-05	9.05975e-08	0.0905975
	36	69				492300	0.000563383	17.56	1.198e+06	5.19009e-05	9.15016e-08	0.0915016
