# Supplementary material for: Destabilizers of the thymidylate synthase homodimer accelerate its proteasomal degradation and inhibit cancer growth
Source: eLife. 2022 Dec 7;11:e73862. doi: 10.7554/eLife.73862 (PMC9831607; doi:10.7554/eLife.73862)
Supplement: Figure 6—figure supplement 1—source data 1. [file elife-73862-fig6-figsupp1-data1.xls]

## Sheet: Cells-std-curve
					standard curve
TSmRNA in pancreatic cells.			TS		y=-4,024x+27,771
			housekeeping		y=-3,320x+23,964
																					RESULTS
	SAMPLE	Detector	Ct	Average	SD	CV	curve	average	SD		Detector	Ct	Average	SD	CV	Curve	average	SD		ratio	average	SD
PDAC2	1	TS	25.51	25.4867	0.0404145	0.00158571	4.74724	4.81191	0.112012		actin	23.43	23.66	0.212838	0.00899569	1.44825	1.24382	0.186719		3.27792	3.92626	0.577702
		TS	25.44				4.94125				actin	23.7				1.20093				4.11452
		TS	25.51				4.74724				actin	23.85				1.08227				4.38636
PDAC5	2	TS	25.35	25.1367	0.220303	0.0087642	5.20239	5.90914	0.747635		actin	24.98	24.9233	0.0602771	0.0024185	0.494283	0.514396	0.0215732		10.5251	11.487	1.3871
		TS	25.15				5.83317				actin	24.86				0.537181				10.8589
		TS	24.91				6.69186				actin	24.93				0.511724				13.0771
LPc167	3	TS	29.59	29.58	0.0953939	0.00322495	0.459753	0.462852	0.0253625		actin	30.73	30.6867	0.159478	0.00519699	0.00916322	0.00948187	0.0010687		50.1738	49.0205	2.759
		TS	29.48				0.489622				actin	30.51				0.0106737				45.872
		TS	29.67				0.439182				actin	30.82				0.00860874				51.0158
