# Supplementary material for: Destabilizers of the thymidylate synthase homodimer accelerate its proteasomal degradation and inhibit cancer growth
Source: eLife. 2022 Dec 7;11:e73862. doi: 10.7554/eLife.73862 (PMC9831607; doi:10.7554/eLife.73862)
Supplement: Figure 6—figure supplement 2—source data 1. [file elife-73862-fig6-figsupp2-data1.xlsx]

## Sheet: Blad2
Cancer cells growth inhibition
Log(conc-drug microM)	LPc167-5FU						LPc167-E7						LPc167-E5
4	5	6	7	8	9	5	3	4	6	2	5	2	12	15	4	7	8	6
3	30	24	21	20	25	32	14	17	11	19	12	5	12	24	22	15	8	10
2	58	54	66	52	55	61	24	33	18	28	27	21	44	45	29	37	42	36
1	74	73	75	70	76	83	54	48	39	57	51	53	55	65	51	45	48	52
0	100	90	112	86	100	94	84	88	84	87	95	101	88	82	95	95	96	99
-1	101	100	112	110	100	105	81	97	86	99	102	100	100	99	98	94	100	104
inhibition cell growth compared to untreated control
