# Supplementary material for: Destabilizers of the thymidylate synthase homodimer accelerate its proteasomal degradation and inhibit cancer growth
Source: eLife. 2022 Dec 7;11:e73862. doi: 10.7554/eLife.73862 (PMC9831607; doi:10.7554/eLife.73862)
Supplement: Figure 6—figure supplement 3—source data 1. [file elife-73862-fig6-figsupp3-data1.xlsx]

## Sheet: 2008
Ovarian cancer cell growth inhibition all compounds
The numbers reported represent the concentrations in µM of each compound tested; in the columns alongside, the relative cell survival percentages of three separate experiments performed in duplicate.
2008 cells																													E4 uM					E5 uM					E6 uM					E7 uM
	C3 uM					C10 uM					E3 uM					E1 uM					5FU uM								0	100	84.32	35.4	5	0	100	49.26	7.24	11.14	0	100	65	52.6	47.35	0	100	53	43.1	31.2	15
	0	100	89	89.6	71.82	0	100	83	64.44	64.24	0	100	84.79	75.32	65	0	100	72	59.3	52.2	0	100	51	39	25	17	1		25	100	90.2	75.2	30	25	100	55	26.2	20	25	100	75.3	60.3	40.2	10	100	63.2	53.3	36.2	19.8
	25	100	85	81	76	25	100	78	62.7	33.8	25	100	90	81	60.4	25	100	82.2	54.4	60.1	5	100	50.27	34	9	7	7		50	100	78.4	48.8	12	50	100	43	42.67	13.6	50	100	71.6	44.6	54.4	25	100	43.8	33.6	25.9	11.5
	50	100	87.76	78.11	68	50	100	74.4	89.24	45.9	50	100	79.5	73	70.6	50	100	84	55	55.5	10	100	48.9	32	13	9	5.5		100					100		73.84			100					50
	100					100					100					100					25																							100
																					50
[truncated: 5 more columns]

## Sheet: A2780
The numbers reported represent the concentrations in µM of each compound tested; in the columns alongside, the relative cell survival percentages of three separate experiments performed in duplicate.
A2780 cells
	C3 uM					C10 uM					E1 uM					E7 uM					5FU uM									E4 uM					E5 uM					E6 uM					E7 uM
	0	100	89.11	71.7	63	0	100	86.12	69.83	65	0	100	61.97	65	60.31	0	100	97	81.58	62.78	0	100	61	40.97	28.3	25	1			0	100	82.61	76.43	36.14	0	100	55.49	39.23	30	0	100	30.95	31	25.5	0	100	49.78	36.61	29.09
	25	100	95	65	55	25	100	92	75	61	25	100	68	61.1	65.4	25	100	94	87	70.4	5		50.27	35.67	8.8	5.9	10.4			25	100	85	82.4	30.4	25	100	47.91	35.79	34.9	25	100	40.4	35.5	20.6	10	100	59.4	46.4	39
	50	100	86.1	78.4	71	50	100	80	65.3	70.4	50	100	56	72.1	55.9	50	100	100	75.5	53.3	10		48.9	33.8	18.3	10.6	5.5			50	100	79.9	70.2	42.5	50	100	51.1	36.4	24.6	50	100	35	25.9	30.8	20	100	39.8	26.6	19.8
	100					100					100					100					25									100					100					100					50
																					50																								100
																					100
[truncated: 6 more columns]

## Sheet: A2780-CP
The numbers reported represent the concentrations in µM of each compound tested; in the columns alongside, the relative cell survival percentages of three separate experiments performed in duplicate.
A2780/CP cells
		C3 uM					C10 uM					E1 uM					E3 uM					5FU uM								E4 uM					E5 uM					E6 uM					E7 uM
		0	100	83	70.2	60.31	0	100	97	83.34	62.78	0	100	87.21	86.8	68.98	0	100	84.14	68.6	54	0	100	71	40.97	34.2	32.2	10.6		0	100	86.91	78.25	66	0	100	61	40.97	35	0	100	32.46	24.77	25	0	100	57	42.2	22.1
		25	100	67.97	65.3	65.1	25	100	100	90	70.7	25	100	95	94.4	60.2	25	100	81	60	50.5	5	100	50.27	55.1	24.6	17.2	1.9		25	100	95	85	60	25	100	50.27	35.67	40	25	100	40	20	30.3	10	100	66.4	52.5	17.5
		50	100	71.4	75	55.2	50	100	94	77	53.5	50	100	79.7	79.6	78	50	100	88	76.3	58.4	10		47.9	53.8	14.7	2.9	19.2		50	100	77	71	54	50	100	52.2	37	30	50	100	25	30	20.5	25	100	47.2	32.8	27.9
		100					100					100					100					25								100					100					100					50
																						50																							100
																						100
[truncated: 6 more columns]

## Sheet: TOV112D
The numbers reported represent the concentrations in µM of each compound tested; in the columns alongside, the relative cell survival percentages of three separate experiments performed in duplicate.
TOV112D cells
	C3 uM					C10 uM										E1 uM					E3 uM					5FU uM								E4 uM					E5 uM					E6 uM					E7 uM
	0	100	83.81	71.7	49.72	0	100	61.97	55.2	40	0	100	97.3	81.58	62.78	0	100	75.38	84.79	68.98	0	100	71.93	54.94	45.4	0	100	68.78	59	39	29	31.67		0	100	76.14	76.43	43.75	0	100	81.25	59.2	19.26	0	100	59.38	45	24.72	0
	25	100	90	65.3	59.2	25	100	68.2	60.2	63.3	25	100	94.2	87.1	70.4	25	100	82.3	80.2	60	25	100	80.2	60.2	50.3	5		56	47	49	38	25		25	100	82.2	82.3	50.1	25	100	90.4	54.4	30.3	25	100	65.4	50.4	31.1	25
	50	100	78.4	78.4	39.3	50	100	56.4	50.1	53.6	50	100	99.9	72.3	50.5	50	100	89.4	90.1	81.3	50	100	64.4	50.5	40.2	10								50	100	70.5	70.7	37.3	50	100	72.2	64.6	11.7	50	100	53.4	40.5	20.9	50
	100					100					100					100					100					25								100					100					100					100
																										50
																										100
[truncated: 9 more columns]

## Sheet: IGROV-1
The numbers reported represent the concentrations in µM of each compound tested; in the columns alongside, the relative cell survival percentages of three separate experiments performed in duplicate.
IGROV1 cells
	C3 uM					C10 uM					E1 uM					E3 uM					5FU uM								E4 uM					E5 uM					E6 uM					E7 uM					D8 uM
	0	100	93.66	89.14	73	0	100	72.57	65.2	60.31	0	100	93.65	75.38	68.98	0	100	87.83	86.91	79	0	100	68.78	56	42	47	31.67		0	100	90.6	92	36.14	0	100	59.84	53.65	48	0	100	56	41.1	34.25	0	100	61.2	39.4	24.4	0
	25	100	100	83	78.3	25	100	78.5	60.1	65.1	25	100	104	82.2	60.8	25	100	80.2	94.4	73.6	5		62.37	61	53.34	37	39		25	100	95.4	88.2	85	25	100	65.2	50.2	43.3	25	100	56.83	51.25	40.5	25	100	54.5	31.3	30.3	25
	50	100	87	95.5	68.5	50	100	66.6	70.4	55.5	50	100	98.9	70.9	78.2	50	100	94.6	79.1	85.2	10								50	100	85.3	83.6	80.1	50	100	55.3	57	33.2	50	100	50.5	46.3	38.3	50	100	52.2	42	18.3	50
	100					100					100					100					25								100				90.2	100					100					100					100
																					50
																					100
[truncated: 4 more columns]

## Sheet: C13 
The numbers reported represent the concentrations in µM of each compound tested; in the columns alongside, the relative cell survival percentages of three separate experiments performed in duplicate.
C13* cells
	C3 uM					C10 uM					E3 uM					E1 uM					5FU uM								E4 uM					E5 uM					E6 uM					D8 uM					E7 uM
	0	100	94.4	90	77.6	0	100	83	73.26	60.31	0	100	89.97	68.6	54	0	100	75.38	64.1	68.98	0	100	61	40	32	24	9.9		0	100	90.6	64.9	36.14	0	100	56.95	11.06	19.91	0	100	65	50	44.25	0	100	86.28	91	80	0
	25	100	90	95	70	25	100	88	61.2	49.4	25	100	85	61.5	50.6	25	100	82	70	60	5		54	53	25	17.2	3		25	100	94.3	60.4	30	25	100	85.22	37.03	25	25	100	75	51.25	42	25	100	92	80	85.5	10
	50	100	90.5	92.61	84	50	100	87.34	85	52.8	50	100	93.2	76	58.2	50	100	70	58	78	10		46	51	13	7	14.3		50	100	84.8	70.5	42	50	100	66.4	47.49	24.4	50	100	68.4	53.6	48.3	50	100	80	100	74.8	25
	100					100					100					100					25								100					100					100					100					50
																					50																												100
																					100
[truncated: 5 more columns]
