# Supplementary material for: Destabilizers of the thymidylate synthase homodimer accelerate its proteasomal degradation and inhibit cancer growth
Source: eLife. 2022 Dec 7;11:e73862. doi: 10.7554/eLife.73862 (PMC9831607; doi:10.7554/eLife.73862)
Supplement: Figure 6—figure supplement 4—source data 1. [file elife-73862-fig6-figsupp4-data1.xlsx]

## Sheet: Foglio1
	Colon cancer cell inhibition E7 and E5
											HCT116								5-FU					E7			HT29			E5
	5-FU					E7						E5							0	100	60	50.5	37	0	100	90	75.3	52.5	37.8	0	100	90	99	83	36
	0	100	60	50.5		0	100	90	75.3	35.2		0	100	90	81	33			5	100	70	57	29.5	10	100	100	88.6	63	49.2	10	100	100	88.6	65	44
	5	100	70	57		10	100	100	85.6	43.4		20	100	96	89	45.2			15	100	50	42	44.5	20	100	86	92	44.1	26.9	20	100	95	92	74	25
	15	100	50	42		20	100	96	94.8	26.7		40	100	95	73.9	24.9			20					40						40
						40						80												60						60
	t test		0.02	0.0074				0.249	0.1198	0.0054				0.076	0.05	0.0079			t test		0.02	0.0074	0.0047			0.194	0.102	0.013	0.01			0.225	0.156	0.037	0.007
									LoVo cells
	5-FU					E7						E5
	0	100	63.8	35.5		0	100	70.2	60.8	35.2		0	100	90	81	41.1
	5	100	37.2	27.6		10	100	86	44.5	43.4		20	100	99	96.5	55.2
	10	100	50.7	42		20	100	54.2	77.2	26.7		40	100	82.2	66.4	25.9
						40						80
	t test		0.023	0.004				0.082	0.053	0.0054				0.186	0.164	0.0197
