# Supplementary material for: Destabilizers of the thymidylate synthase homodimer accelerate its proteasomal degradation and inhibit cancer growth
Source: eLife. 2022 Dec 7;11:e73862. doi: 10.7554/eLife.73862 (PMC9831607; doi:10.7554/eLife.73862)
Supplement: Figure 7—figure supplement 1—source data 8. [file elife-73862-fig7-figsupp1-data8.xlsx]

## Sheet: TS activity A-ACP cells
TS activity assay for A2780 and A2780/CP cell lines after treatment with E5 and E7
		A2780 cells					A2780/CP cells
	sample number	ctrl	E5 28.8 uM	E7 10.1 uM		sample number	ctrl	E5 34.3 uM	E7 21.5 uM
	1	100	84.2	65		8	100	84.3	69.2
	3	100	71.2	60.2		10	100	79.9	79.1
	5	100	69	74.3		12	100	68.8	59.8
	The numbers indicate the residual TS activity (% on control) after treatment with the IC50 values of the two drugs in the two cell lines

## Sheet: TS activity 2008-C13 cells
TS activity assay for 2008 and C13* cell lines after treatment with E5 and E7
		2008 cells					C13* cells
	sample number	ctrl	E5 29.8 uM	E7 14.6 uM		sample number	ctrl	E5 38.3 uM	E7 21.1 uM
	1	100	72.1	67.9		8	100	81.3	77.9
	3	100	79.2	72.1		10	100	79.9	82.1
	5	100	65.5	67.9		12	100	80.5	77.9
	The numbers indicate the residual TS activity (% on control) after treatment with the IC50 values of the two drugs in the two cell lines
