# Supplementary material for: Destabilizers of the thymidylate synthase homodimer accelerate its proteasomal degradation and inhibit cancer growth
Source: eLife. 2022 Dec 7;11:e73862. doi: 10.7554/eLife.73862 (PMC9831607; doi:10.7554/eLife.73862)
Supplement: Figure 8—figure supplement 1—source data 1. [file elife-73862-fig8-figsupp1-data1.xlsx]

## Sheet: Foglio1
	Survival of survivor_figure_n4.csv								Ovarian cancer experiment in mice
		Control	E7	5-FU
	Number of rows	12	12	12
	# of blank lines	8	8	8
	# rows with impossible data	0	0	0
	# censored subjects	0	0	0
	# deaths/events	4	4	4
	Median survival	16	24	22.5

## Sheet: Foglio2
	AUC of tumor_growth_all_1week_figure.csv
		Control	E7	5-FU
	Baseline	0	0	0
	Total Area	7734	2004	2710
	Std. Error	1294	700.4	1075
	95% Confidence Interval	5198 to 10270	631.7 to 3377	603.7 to 4817
	Total Peak Area	7734	2004	2710
	Std. Error	1294	700.4	1075
	95% Confidence Interval	5198 to 10270	631.7 to 3377	603.7 to 4817
	Number of Peaks	1	1	1
	Peak 1
	First X	1	1	1
	Last X	7	7	7
	Peak X	7	7	6
	Peak Y	3102	776.5	656.4
	Area	7734	2004	2710
	Std. Error	1294	700.4	1075
	95% Confidence Interval	5198 to 10270	631.7 to 3377	603.7 to 4817
	%Area	100	100	100

## Sheet: Foglio3
	Ordinary one-way ANOVA of tumor_growth_all_1week_figure.csv
	Number of families	1
	Number of comparisons per family	2
	Alpha	0.05
	Dunnett's multiple comparisons test	Mean Diff.	95.00% CI of diff.	Significant?	Summary	Adjusted P Value	A-?
	Control vs. E7	1137	-431.9 to 2705	No	ns	0.1553	B	E7
	Control vs. 5-FU	1085	-483.9 to 2653	No	ns	0.1771	C	5-FU
	Test details	Mean 1	Mean 2	Mean Diff.	SE of diff.	n1	n2	q	DF
	Control vs. E7	1531	394.9	1137	600	4	4	1894	9
	Control vs. 5-FU	1531	446.9	1085	600	4	4	1808	9

## Sheet: Foglio4
	survivor_figure_n4.csv
		gg	Control	E7	5-FU
	G2	16	1
	G3	15	1
	G4	16	1
	G5	16	1
	G2	24		1
	G4	22		1
	G5	24		1
	G6	24		1
	G2	24			1
	G3	21			1
	G4	16			1
	G6	24			1

## Sheet: Foglio5
	AUC_figure.csv
	Control	Control	5-FU	5-FU	E7	E7
	7734	1294	2710	1075	2004	700

## Sheet: Foglio6
		tumor_growth_all_1week_figure.csv
	days	Control	Control	Control	Control	E7	E7	E7	E7	5-FU	5-FU	5-FU	5-FU	LC/5FU	LC/5FU
	1	181.57	94.22	180.71	120.62	23.67	46.52	51.75	126.81	31.6	142.75	278.66	133.18
	3	516.18	176.72	1149.42	396.09	181.9	55.79	182.39	158.74	209.38	344.58	762.99	200.43
	6	2654.68	1792.73	2963.21	1868.8	498.74	257.01	436.12	1192.69	304.8	314.66	1543.2	463.1
	7	4598.83	2513.27	2963	2333.03	720.35	421.14	509.5	1454.97	438.62	391.94	1136.44	453.75

## Sheet: Foglio7
	survivor_significance.csv
	gg	vehicle	E7	5-FU	E7-5FU
		23	16	23	22
		15	23	22	14
		14	15	16	23
		15	23	23	23
		15	23		15
			23		23
