# Supplementary material for: Destabilizers of the thymidylate synthase homodimer accelerate its proteasomal degradation and inhibit cancer growth
Source: eLife. 2022 Dec 7;11:e73862. doi: 10.7554/eLife.73862 (PMC9831607; doi:10.7554/eLife.73862)
Supplement: Figure 8—source data 1. [file elife-73862-fig8-data1.xlsx]

## Sheet: Tumor volume
Orthotopic pancreatic cancer
	Days															percentages of control
Control		mouse1	mouse2	mouse3	mouse4	mouse5	mouse6
	1							average	SD	CV
	5	9845	8975	6788	7544	7857	8664	8278.83	1097.85	0.132609
	10	16784	14562	15641	17812	13572	15661	15672	1513.89	0.0965984
	15	21374	18965	22451	22478	18921	21862	21008.5	1651.41	0.0786069
	20	42358	36749	38754	39712	40572	38663	39468	1906.89	0.048315
	25	71325	64734	67578	dead	59886	76003	67905.2	6159.15	0.0907022
	30	121245	100236	103562	dead	89876	103826	103749	11302.1	0.108937
	35	174299	156452	176653	dead	dead	153986	165348	11777.9	0.0712312
5-fluoruracil		mouse1	mouse2	mouse3	mouse4	mouse5	mouse6				t-test vs control
	1
	5	7943	7853	6742	8751	7735	8972	7999.33	798.302	0.099796	0.558651
	10	14289	12564	13876	13284	14096	15632	13956.8	1032.97	0.0740116	0.0684311
	15	15825	19846	18006	19753	17593	22963	18997.7	2450.97	0.129014	0.131867
	20	32684	37623	35574	38749	30972	39752	35892.3	3483.02	0.0970408	0.136429
	25	46746	53277	48794	55691	69781	68523	57135.3	9839.52	0.172214	0.149553
	30	64520	82639	76183	84312	68912	55217	71963.8	11219.8	0.155909	0.0116941					69.3634
	35	135623	148930	117842	dead	117842	147568	133561	15254.7	0.114216	0.11667
Compound		mouse1	mouse2	mouse3	mouse4	mouse5	mouse6
	1										t-test vs 5-FU	t-test vs control
	5	8875	9652	8943	8574	9021	7943	8834.67	561.985	0.0636113	0.155803	0.305733
	10	12489	14526	13271	11278	16239	13561	13560.7	1705.77	0.125788	0.643291	0.168119
	15	17835	19752	15472	17893	16739	17523	17535.7	1415.84	0.0807404	0.212546	0.0225077
	20	34638	29621	31014	30985	32012	31684	31659	1674.72	0.0528987	0.0756305	1.38583e-06	no
	25	47653	49013	45973	44194	43731	46538	46183.7	2015.36	0.0436379	0.0582287	0.00111715
	30	51863	45872	50971	47845	39026	63512	49848.2	8111.26	0.162719	0.0261761	0.000329143				48.0469
	35	96449	80452	92318	72374	101298	75491	86397	11908.6	0.137835	0.0166302	2.59142e-05

## Sheet: body-weight
	Days
Control		mouse1	mouse2	mouse3	mouse4	mouse5	mouse6
	1							average	SD	CV
	5	23	24	22	24	25	23	23.5	1.04881	0.0446302
	10	23	24	23	24	25	24	23.8333	0.752773	0.0315849
	15	24	24	23	21	24	24	23.3333	1.21106	0.0519026
	20	24	23	23	18	23	24	22.5	2.25832	0.10037
	25	25	22	23	dead	21	24	23	1.58114	0.0687452
	30	25	22	23	dead	17	24	22.2	3.11448	0.140292
	35	25	21	23	dead	dead	21	22.5	1.91485	0.0851046
5-fluoruracil		mouse1	mouse2	mouse3	mouse4	mouse5	mouse6				t-test vs control
	1
	5	23	22	24	24	22	25	23.3333	1.21106	0.0519026	0.849361
	10	21	21	22	23	23	24	22.3333	1.21106	0.0542266	0.0172245
	15	21	21	22	21	22	23	21.6667	0.816497	0.0376845	0.0198681
	20	21	22	22	21	22	23	21.8333	0.752773	0.0344781	0.444113
	25	21	22	23	22	22	23	22.1667	0.752773	0.0339597	0.405023
	30	22	23	22	17	21	23	21.3333	2.25093	0.105512	1
	35	23	21	22	dead	21	24	22.2	1.30384	0.0587316	1
Compound		mouse1	mouse2	mouse3	mouse4	mouse5	mouse6
	1										t-test vs 5-FU	t-test vs control
	5	23	24	23	25	22	24	23.5	1.04881	0.0446302	0.741154	1
	10	22	24	22	23	22	23	22.6667	0.816497	0.0360219	0.610881	0.0335324
	15	22	23	22	22	22	23	22.3333	0.516398	0.0231223	0.101939	0.0755868
	20	22	23	22	22	22	22	22.1667	0.408248	0.0184172	0.363217	0.73163
	25	22	23	23	23	22	21	22.3333	0.816497	0.0365595	0.741154	0.432
	30	23	23	23	23	21	21	22.3333	1.0328	0.0462446	0.40318	1
	35	23	24	23	22	21	22	22.5	1.04881	0.0466137	0.648261	0.663808

## Sheet: Survival
death after how many days
	Control	5-FU	Compound
	25	33	36
	34	46	48
	42	46	56
	45	54	60
	50	58	63
	53	62	64
median	43.5	50	58
Logrank vs control		0.02
Logrank v s5FU		ns

## Sheet: PCR
						standard curve
				TS		y=-4,024x+28,232
				housekeeping		y=-3,320x+23,964
	N	SAMPLE	Detector	Ct	Average	SD	CV	curve	average	SD		Detector	Ct	Average	SD	CV	Curve	average	SD		ratio	average	SD	SEM
	1	Control	TS	26.08	26.08	0.05	0.00191718	3.42603	3.42697	0.0980377		actin	25.78	25.6733	0.0971253	0.00378312	0.2838	0.30605	0.0203676		12.072	11.2269	0.736704	0.425336
			TS	26.13				3.3294				actin	25.65				0.310577				10.7201
			TS	26.03				3.52547				actin	25.59				0.323773				10.8887
NO	2	5FU	TS	29.51	29.7667	0.226789	0.0076189	0.481289	0.417933	0.0557617		actin	28.15	28.1033	0.0503322	0.00179097	0.0548475	0.0566748	0.00198482		8.77504	7.40078	1.23044	0.710395	x
			TS	29.94				0.376311				actin	28.05				0.0587864				6.40132
			TS	29.85				0.396198				actin	28.11				0.0563904				7.02599
	3	Compound	TS	26.15	26.1833	0.0305505	0.00116679	3.29151	3.22966	0.0566104		actin	24.61	24.5267	0.119304	0.00486424	0.638884	0.678465	0.0573189		5.15198	4.78347	0.422179	0.243745
			TS	26.21				3.18042				actin	24.58				0.652316				4.87559
			TS	26.19				3.21703				actin	24.39				0.744195				4.32283
	4	Control	TS	29.12	29.22	0.14	0.00479124	0.601622	0.569362	0.0446087		actin	28.14	28.5833	0.410406	0.0143582	0.0552292	0.0417426	0.0121951		10.8932	14.2089	2.9328	1.69325
			TS	29.16				0.588009				actin	28.66				0.0385072				15.2701
			TS	29.38				0.518456				actin	28.95				0.0314915				16.4634
	5	5FU	TS	26.65	26.7433	0.197315	0.00737811	2.47253	2.35371	0.256979		actin	26.08	25.9867	0.0814453	0.00313412	0.230489	0.246162	0.0136864		10.7273	9.5936	1.30816	0.755266
			TS	26.61				2.52977				actin	25.93				0.255759				9.89123
			TS	26.97				2.05882				actin	25.95				0.252236				8.16227
	6	Compound	TS	26.06	26.14	0.069282	0.00265042	3.46546	3.31215	0.132774		actin	24.82	24.7867	0.0305505	0.00123254	0.552292	0.565293	0.0119373		6.2747	5.86408	0.357766	0.206556
			TS	26.18				3.23549				actin	24.76				0.575759				5.61952
			TS	26.18				3.23549				actin	24.78				0.567828				5.69801
second slide	1	Control	TS	27.87	27.8433	0.0251661	0.000903847	1.23016	1.24916	0.0179626		actin	27.29	27.2633	0.0378594	0.00138866	0.0995847	0.101467	0.00268258		12.3529	12.3159	0.327725	0.189212
			TS	27.84				1.25146				actin	27.22				0.104539				11.9712
			TS	27.82				1.26586				actin	27.28				0.100278				12.6235
re-checked	2	5FU	TS	26.85	26.9067	0.0550757	0.00204692	2.20516	2.13551	0.067388		actin	26.45	26.5033	0.0503322	0.00189909	0.178322	0.171916	0.00602073		12.3662	12.4261	0.35469	0.20478
			TS	26.96				2.07063				actin	26.51				0.171054				12.1052
			TS	26.91				2.13073				actin	26.55				0.166374				12.8069
	3	Compound	TS	26.26	26.2333	0.0378594	0.00144318	3.09072	3.13874	0.0683833		actin	24.88	24.81	0.06245	0.00251713	0.529781	0.556481	0.0238709		5.83396	5.64592	0.22346	0.129015
			TS	26.25				3.10846				actin	24.76				0.575759				5.39888
			TS	26.19				3.21703				actin	24.79				0.563904				5.70493

## Sheet: schedule
	Thursday	Friday	Saturday	Sunday	Monday	Tuesday	Wednesday
week1	16	17	18	19	20					inoculum
week2	21	22	23	24	25	26	27			treatment
week3	28	29	30	31	1	2	3		BLI
week4	4	5	6	7	8	9	10
week5	11	12	13	14	15	16	17
week6	18	19	20	21	22	23	24
week7	25	26	27	28	29	30	31
week8	1	2	3	4	5	6	7
week9	8	9	10	11	12
					lastday=64
Drug calculation
IN VIVO		dose
		10
mice	weight kg	10 mg / kg / dosis	daily mg	days	weeks
1	0.02	0.2	0.2	3	3
6			1.2	3.6	10.8
total amount needed (mg):		10.8
from the 16th of December to the 12th of February
	.
