# Supplementary material for: Destabilizers of the thymidylate synthase homodimer accelerate its proteasomal degradation and inhibit cancer growth
Source: eLife journal article supplement (doi:10.7554/elife.73862), 2022-12-02
Supplement: supp [file elife-73862-supp-v1.zip]

**Figure 8-figure supplement 2-Source data 1.** Quantitative PCR (qPCR) measurements of hTS transcripts in A2780 and A2780/CP cells treated with E7, E5 and 5FU. Data indicate mean values and standard deviation (SD) of biological repeats performed in duplicate.

| <b>A2780 cells</b>                     | <b>Relative hTS mRNA</b> |
|----------------------------------------|--------------------------|
| <b>CTRL</b>                            | 1.00                     |
| <b>E7 – 12h - 20 <math>\mu</math>M</b> | 0.51 $\pm$ 0.04          |
| <b>E7 – 12h - 40 <math>\mu</math>M</b> | 0.47 $\pm$ 0.10          |
| <b>E5 – 12h - 30 <math>\mu</math>M</b> | 0.54 $\pm$ 0.46          |
| <b>E5 – 12h - 60 <math>\mu</math>M</b> | 0.53 $\pm$ 0.23          |
| <b>5FU - 24h - 5<math>\mu</math>M</b>  | 0.70 $\pm$ 0.04          |
| <b>5FU - 72h - 5<math>\mu</math>M</b>  | 0.50 $\pm$ 0.24          |
| <b>A2780/CP</b>                        |                          |
| <b>CTRL</b>                            | 1.00                     |
| <b>E7 – 12h - 20 <math>\mu</math>M</b> | 0.66 $\pm$ 0.11          |
| <b>E7 – 12h - 40 <math>\mu</math>M</b> | 0.53 $\pm$ 0.01          |
| <b>E5 – 12h - 30 <math>\mu</math>M</b> | 0.74 $\pm$ 0.08          |
| <b>E5 – 12h - 60 <math>\mu</math>M</b> | 0.56 $\pm$ 0.01          |
| <b>5FU - 24h - 5<math>\mu</math>M</b>  | 0.57 $\pm$ 0.07          |
| <b>5FU - 72h - 5<math>\mu</math>M</b>  | 0.29 $\pm$ 0.09          |
